# Supplementary material for: Maternal occupational exposure and congenital heart defects in offspring
Source: PubMed Central journal article supplement (PMC7737813; doi:10.5271/sjweh.3912), 2020-10-30
Supplement: SJWEH-46-599-S001.pdf [file SJWEH-46-599-S001.pdf]

# Maternal occupational exposure and congenital heart defects in offspring<sup>1</sup>

by Nynke Spinder, MD,<sup>2</sup> Jorieke EH Bergman, MD, PhD, Hans Kromhout, PhD, Roel Vermeulen, PhD, Nicole Corsten-Janssen, MD, H Marike Boezen, PhD, Gideon J du Marchie Sarvaas, MD, Hermien EK de Walle, PhD

1. Supplementary tables
2. Correspondence to: Nynke Spinder, Department of Epidemiology, University of Groningen, University Medical Center Groningen, Hanzeplein 1, P.O. Box 30.001, 9700 RB Groningen, The Netherlands. [E-mail: n.spinder@umcg.nl]

**Table S1** Prevalence, crude OR and adjusted OR of maternal occupational exposures and CHDs in offspring.

|                           | Controls        |         | CHDs            |         | Unadjusted  |                   | Adjusted <sup>a</sup> |                  |
|---------------------------|-----------------|---------|-----------------|---------|-------------|-------------------|-----------------------|------------------|
|                           | n               | (%)     | n               | (%)     | OR          | 95% CI            | OR                    | 95% CI           |
| <b>Any CHD</b>            | <b>(n=5602)</b> |         | <b>(n=1174)</b> |         |             |                   |                       |                  |
| No exposure               | 5179            | (92.4%) | 1053            | (89.7%) | Ref         |                   | Ref                   |                  |
| Mineral dust only         | 403             | (7.2%)  | 109             | (9.3%)  | 1.33        | 1.07-1.66         | 1.22                  | 0.95-1.57        |
| Metal dust and fumes only | 5               | (0.1%)  | <5              |         | NC          |                   | NC                    |                  |
| Both                      | 15              | (0.3%)  | 11              | (0.9%)  | <b>3.61</b> | <b>1.65-7.88</b>  | <b>2.92</b>           | <b>1.23-6.92</b> |
| <b>Septal defects</b>     | <b>(n=5602)</b> |         | <b>(n=544)</b>  |         |             |                   |                       |                  |
| No exposure               | 5179            | (92.4%) | 496             | (91.2%) | Ref         |                   | Ref                   |                  |
| Mineral dust only         | 403             | (7.2%)  | 42              | (7.7%)  | 1.09        | 0.78-1.52         | 0.96                  | 0.67-1.38        |
| Metal dust and fumes only | 13              | (1.1%)  | <5              |         | NC          |                   | NC                    |                  |
| Both                      | 15              | (0.3%)  | 6               | (1.1%)  | <b>4.18</b> | <b>1.61-10.81</b> | <b>3.23</b>           | <b>1.14-9.11</b> |

CHD, congenital heart defects; LVOTO, left ventricular outflow tract obstruction; NC, not calculated due to sparse data. <sup>a</sup> Adjusted for child sex, maternal age at delivery (as continuous variable), educational level, maternal BMI (as continuous variable), smoking and alcohol use during pregnancy, folic acid supplementation, and fertility problems. **Bold indicates significant value (P<0.05)**

**Table S2** Prevalence, crude OR and adjusted OR of maternal periconceptional exposure and isolated CHDs in the offspring.

| CHD classification    | Occupational exposure |         |         |            |            |                       |              |         |         |            |           |                       |           |
|-----------------------|-----------------------|---------|---------|------------|------------|-----------------------|--------------|---------|---------|------------|-----------|-----------------------|-----------|
|                       | Any exposure          |         |         |            |            |                       | Organic dust |         |         |            |           |                       |           |
|                       | Total                 | Exposed |         | Unadjusted |            | Adjusted <sup>a</sup> |              | Exposed |         | Unadjusted |           | Adjusted <sup>a</sup> |           |
|                       | n                     | n       | %       | OR         | 95% CI     | OR                    | 95% CI       | n       | %       | OR         | 95% CI    | OR                    | 95% CI    |
| Controls              | 5602                  | 1992    | (35.6%) | Ref        |            | Ref                   | 1992         | 1617    | (28.9%) | Ref        |           | Ref                   |           |
| Total CHD             | 1009                  | 374     | (37.1%) | 1.07       | 0.93-1.23  | 1.02                  | 0.871-1.19   | 300     | (29.7%) | 1.04       | 0.90-1.21 | 1.07                  | 0.91-1.26 |
| Conotruncal           | 144                   | 55      | (38.2%) | 1.12       | 0.80-1.57  | 1.08                  | 0.75-1.55    | 45      | (31.3%) | 1.12       | 0.78-1.60 | 1.21                  | 0.84-1.76 |
| d-TGA                 | 64                    | 23      | (35.9%) | 1.02       | 0.61-1.70  | 0.95                  | 0.54-1.65    | 18      | (28.1%) | 0.96       | 0.56-1.67 | 1.06                  | 0.60-1.89 |
| Tetralogy of Fallot   | 45                    | 21      | (46.7%) | 1.59       | 0.88-2.86  | 1.56                  | 0.85-2.88    | 17      | (37.8%) | 1.50       | 0.82-2.74 | 1.60                  | 0.85-2.96 |
| LVOTO                 | 155                   | 55      | (35.5%) | 1.00       | 0.72-1.39  | 0.92                  | 0.64-1.32    | 46      | (29.7%) | 1.04       | 0.73-1.48 | 1.09                  | 0.75-1.58 |
| HLHS                  | 45                    | 17      | (37.8%) | 1.10       | 0.60-2.02  | 0.83                  | 0.44-1.59    | 13      | (28.9%) | 1.00       | 0.52-1.91 | 0.80                  | 0.40-1.61 |
| Aortic stenosis       | 28                    | 5       | (17.9%) | 0.40       | 0.15-1.04  | 0.37                  | 0.13-1.10    | <5      |         | NC         |           | NC                    |           |
| Coarctation of aorta  | 39                    | 16      | (41.0%) | 1.26       | 0.66-2.39  | 1.19                  | 0.61-2.34    | 15      | (38.5%) | 1.54       | 0.81-2.94 | 1.73                  | 0.89-3.37 |
| Bicuspid aortic valve | 37                    | 15      | (40.5%) | 1.24       | 0.64-2.39  | 1.25                  | 0.63-2.49    | 13      | (35.1%) | 1.34       | 0.68-2.63 | 1.49                  | 0.74-2.99 |
| RVOTO                 | 127                   | 52      | (40.9%) | 1.26       | 0.88-1.80  | 1.16                  | 0.80-1.68    | 43      | (33.9%) | 1.26       | 0.87-1.83 | 1.24                  | 0.84-1.82 |
| P(v)S                 | 94                    | 56      | (40.4%) | 1.23       | 0.81-1.86  | 1.12                  | 0.73-1.73    | 31      | (33.0%) | 1.21       | 0.79-1.87 | 1.18                  | 0.75-1.84 |
| Pulmonary atresia     | 13                    | 6       | (46.2%) | 1.55       | 0.52-4.63  | 1.37                  | 0.45-4.20    | 6       | (46.2%) | 2.11       | 0.71-6.30 | 2.13                  | 0.70-6.43 |
| Septal                | 459                   | 164     | (35.7%) | 1.01       | 0.83-1.23  | 0.99                  | 0.80-1.22    | 129     | (28.1%) | 0.96       | 0.78-1.19 | 1.01                  | 0.80-1.26 |
| Perimembranous VSD    | 91                    | 41      | (45.1%) | 1.49       | 0.98-2.25  | 1.50                  | 0.97-2.32    | 33      | (36.3%) | 1.40       | 0.91-2.16 | 1.54                  | 0.99-2.40 |
| Muscular VSD          | 218                   | 70      | (32.1%) | 0.86       | 0.64-1.15  | 0.88                  | 0.65-1.20    | 57      | (26.1%) | 0.87       | 0.64-1.19 | 0.94                  | 0.68-1.29 |
| Other VSD             | 67                    | 22      | (32.8%) | 0.89       | 0.53-1.48  | 0.95                  | 0.56-1.63    | 14      | (20.9%) | 0.65       | 0.36-1.18 | 0.76                  | 0.41-1.40 |
| ASD                   | 82                    | 31      | (37.8%) | 1.10       | 0.70-1.73  | 0.97                  | 0.60-1.55    | 25      | (30.5%) | 1.08       | 0.67-1.74 | 1.03                  | 0.63-1.68 |
| AVSD                  | 24                    | 5       | (20.8%) | 0.48       | 0.18-1.28  | 0.51                  | 0.18-1.42    | <5      |         | NC         |           | NC                    |           |
| APVR                  | 15                    | 8       | (53.3%) | 2.07       | 0.75-5.72  | 1.83                  | 0.63-5.34    | 7       | (46.7%) | 2.16       | 0.78-5.96 | 1.87                  | 0.64-5.45 |
| Total APVR            | 11                    | 5       | (45.5%) | 1.51       | 0.46-4.96  | 1.48                  | 0.44-4.97    | 5       | (45.5%) | 2.05       | 0.63-6.74 | 2.03                  | 0.61-6.76 |
| Complex               | 38                    | 16      | (42.1%) | 1.32       | 0.69-2.52  | 1.18                  | 0.58-2.37    | 13      | (34.2%) | 1.28       | 0.65-2.51 | 1.22                  | 0.59-2.53 |
| Single ventricle      | 11                    | 7       | (63.6%) | 3.17       | 0.93-10.85 | 2.56                  | 0.72-9.09    | 5       | (45.5%) | 2.05       | 0.63-6.74 | 1.96                  | 0.58-6.64 |
| Associations          |                       |         |         |            |            |                       |              |         |         |            |           |                       |           |
| CoA + VSD             | 14                    | 7       | (50.0%) | 1.81       | 0.64-5.17  | 1.88                  | 0.63-5.58    | 5       | (35.7%) | 1.37       | 0.46-4.09 | 1.50                  | 0.49-4.59 |
| P(v)S + VSD           | 17                    | 9       | (52.9%) | 2.04       | 0.79-5.29  | 2.46                  | 0.92-6.57    | 7       | (41.2%) | 1.73       | 0.66-4.54 | 2.07                  | 0.77-5.56 |

CHD, congenital heart defects; d-TGA, dextro-transposition of the great arteries; LVOTO, left ventricular outflow tract obstruction; HLHS, hypoplastic left heart syndrome; RVOTO, right ventricular outflow tract obstruction; P(v)S, pulmonary (valve) stenosis; CoA, coarctation of aorta; VSD, ventricular septal defect; ASD, atrial septal defect; AVSD, atrioventricular septal defect; APVR, anomalous pulmonary venous return; NC, not calculated due to sparse data. <sup>a</sup> Adjusted for child sex, maternal age at delivery (as continuous variable), education level, maternal BMI (as continuous variable), smoking and alcohol use during pregnancy, folic acid supplementation, and fertility problems. \*p-value <0.01.

Table S2 Continued.

| CHD classification    | Occupational exposure |         |         |             |                   |                       |                  |         |         |            |           |                       |           |
|-----------------------|-----------------------|---------|---------|-------------|-------------------|-----------------------|------------------|---------|---------|------------|-----------|-----------------------|-----------|
|                       | Mineral dust          |         |         |             |                   |                       | Solvents         |         |         |            |           |                       |           |
|                       | Total                 | Exposed |         | Unadjusted  |                   | Adjusted <sup>a</sup> |                  | Exposed |         | Unadjusted |           | Adjusted <sup>a</sup> |           |
| n                     | n                     | %       | OR      | 95% CI      | OR                | 95% CI                | n                | %       | OR      | 95% CI     | OR        | 95% CI                |           |
| Controls              | 5602                  | 418     | (7.5%)  | Ref         |                   | Ref                   |                  | 1370    | (24.5%) | Ref        |           | Ref                   |           |
| Total CHD             | 1174                  | 104     | (10.3%) | <b>1.43</b> | <b>1.14-1.79</b>  | <b>1.33</b>           | <b>1.03-1.72</b> | 238     | (23.6%) | 0.95       | 0.82-1.12 | 0.95                  | 0.80-1.13 |
| Conotruncal           | 144                   | 13      | (9.0%)  | 1.23        | 0.69-2.20         | 1.18                  | 0.64-2.18        | 35      | (24.3%) | 0.99       | 0.68-1.46 | 1.07                  | 0.72-1.58 |
| d-TGA                 | 64                    | <5      |         | NC          |                   | NC                    |                  | 15      | (23.4%) | 0.95       | 0.53-1.67 | 1.10                  | 0.60-1.99 |
| Tetralogy of Fallot   | 45                    | 5       | (11.1%) | 1.55        | 0.61-3.95         | 1.43                  | 0.53-3.82        | 15      | (33.3%) | 1.55       | 0.83-2.88 | 1.55                  | 0.82-2.93 |
| LVOTO                 | 155                   | 21      | (13.5%) | <b>1.94</b> | <b>1.21-3.11*</b> | <b>1.93</b>           | <b>1.15-3.23</b> | 32      | (20.6%) | 0.80       | 0.54-1.19 | 0.77                  | 0.51-1.17 |
| HLHS                  | 45                    | 7       | (15.6%) | <b>2.29</b> | <b>1.01-5.15</b>  | 1.82                  | 0.74-4.51        | 9       | (20.0%) | 0.77       | 0.37-1.61 | 0.63                  | 0.29-1.37 |
| Aortic stenosis       | 28                    | <5      |         | NC          |                   | NC                    |                  | <5      |         | NC         |           | NC                    |           |
| Coarctation of aorta  | 39                    | 7       | (17.9%) | <b>2.71</b> | <b>1.19-6.18</b>  | <b>3.12</b>           | <b>1.27-7.65</b> | 7       | (17.9%) | 0.68       | 0.30-1.53 | 0.69                  | 0.30-1.58 |
| Bicuspid aortic valve | 37                    | 5       | (13.5%) | 1.94        | 0.75-5.00         | 1.73                  | 0.64-4.69        | 10      | (27.0%) | 1.14       | 0.55-2.37 | 1.25                  | 0.59-2.65 |
| RVOTO                 | 127                   | 17      | (13.4%) | <b>1.92</b> | <b>1.14-3.23</b>  | <b>1.61</b>           | <b>0.91-2.84</b> | 33      | (26.0%) | 1.08       | 0.73-1.62 | 1.08                  | 0.72-1.63 |
| P(v)S                 | 94                    | 14      | (14.9%) | <b>2.17</b> | <b>1.22-3.86*</b> | 1.79                  | 0.95-3.37        | 22      | (23.4%) | 0.94       | 0.58-1.53 | 0.95                  | 0.58-1.55 |
| Pulmonary atresia     | 13                    | <5      |         | NC          |                   | NC                    |                  | <5      |         | NC         |           | NC                    |           |
| Septal                | 459                   | 41      | (8.9%)  | 1.22        | 0.87-1.70         | 1.12                  | 0.78-1.62        | 107     | (23.3%) | 0.94       | 0.75-1.18 | 0.96                  | 0.75-1.21 |
| Perimembranous VSD    | 91                    | 10      | (11.0%) | 1.53        | 0.79-2.98         | 1.47                  | 0.73-2.98        | 27      | (29.7%) | 1.30       | 0.83-2.05 | 1.38                  | 0.87-2.20 |
| Muscular VSD          | 218                   | 19      | (8.7%)  | 1.18        | 0.73-1.92         | 1.23                  | 0.74-2.06        | 48      | (22.0%) | 0.87       | 0.63-1.21 | 0.89                  | 0.63-1.24 |
| Other VSD             | 67                    | 5       | (7.5%)  | 1.00        | 0.40-2.50         | 1.02                  | 0.39-2.66        | 12      | (17.9%) | 0.67       | 0.36-1.26 | 0.72                  | 0.38-1.37 |
| ASD                   | 82                    | 7       | (8.5%)  | 1.16        | 0.53-2.53         | 0.88                  | 0.38-2.00        | 20      | (24.4%) | 1.00       | 0.60-1.66 | 0.95                  | 0.56-1.62 |
| AVSD                  | 24                    | <5      |         | NC          |                   | NC                    |                  | NC      |         | NC         |           | NC                    |           |
| APVR                  | 17                    | <5      |         | NC          |                   | NC                    |                  | 7       | (46.7%) | 2.70       | 0.98-7.47 | 2.07                  | 0.71-6.03 |
| Total APVR            | 11                    | <5      |         | NC          |                   | NC                    |                  | 5       | (45.5%) | 2.57       | 0.78-8.45 | 2.23                  | 0.67-7.42 |
| Complex               | 38                    | <5      |         | NC          |                   | NC                    |                  | <5      |         | NC         |           | NC                    |           |
| Single ventricle      | 11                    | <5      |         | NC          |                   | NC                    |                  | 12      | (31.6%) | 1.43       | 0.72-2.83 | 1.41                  | 0.68-2.92 |
| Associations          |                       |         |         |             |                   |                       |                  | <5      |         | NC         |           | NC                    |           |
| CoA + VSD             | 14                    | <5      |         | NC          |                   | NC                    |                  | <5      |         | NC         |           | NC                    |           |
| P(v)S + VSD           | 17                    | <5      |         | NC          |                   | NC                    |                  | 6       | (35.3%) | 1.69       | 0.62-4.57 | 1.71                  | 0.62-4.74 |

CHD, congenital heart defects; d-TGA, dextro-transposition of the great arteries; LVOTO, left ventricular outflow tract obstruction; HLHS, hypoplastic left heart syndrome; RVOTO, right ventricular outflow tract obstruction; P(v)S, pulmonary (valve) stenosis; CoA, coarctation of aorta; VSD, ventricular septal defect; ASD, atrial septal defect; AVSD, atrioventricular septal defect; APVR, anomalous pulmonary venous return; NC, not calculated due to sparse data. <sup>a</sup>Adjusted for child sex, maternal age at delivery (as continuous variable), education level, maternal BMI (as continuous variable), smoking and alcohol use during pregnancy, folic acid supplementation, and fertility problems. \*p-value <0.01. **Bold indicates significant value (P<0.05)**

Table S2 Continued.

| CHD classification    | Occupational exposure |     |         |      |            |      |                       |    |         |             |                   |             |                       |  |
|-----------------------|-----------------------|-----|---------|------|------------|------|-----------------------|----|---------|-------------|-------------------|-------------|-----------------------|--|
|                       | Pesticides            |     |         |      |            |      | Metal dust and fumes  |    |         |             |                   |             |                       |  |
|                       | Total                 |     | Exposed |      | Unadjusted |      | Adjusted <sup>a</sup> |    | Exposed |             | Unadjusted        |             | Adjusted <sup>a</sup> |  |
|                       | n                     | n   | %       | OR   | 95% CI     | OR   | 95% CI                | n  | %       | OR          | 95% CI            | OR          | 95% CI                |  |
| Controls              | 5602                  | 131 | (2.3%)  | Ref  |            | Ref  |                       | 20 | (0.4%)  | Ref         |                   | Ref         |                       |  |
| Total CHD             | 1174                  | 29  | (2.9%)  | 1.24 | 0.82-1.24  | 1.20 | 0.77-1.86             | 12 | (1.2%)  | <b>3.36</b> | <b>1.64-6.90*</b> | <b>2.81</b> | <b>1.28-6.16</b>      |  |
| Conotruncal           | 144                   | <5  |         | NC   |            | NC   |                       | <5 |         | NC          |                   | NC          |                       |  |
| d-TGA                 | 64                    | <5  |         | NC   |            | NC   |                       | <5 |         | NC          |                   | NC          |                       |  |
| Tetralogy of Fallot   | 45                    | <5  |         | NC   |            | NC   |                       | <5 |         | NC          |                   | NC          |                       |  |
| LVOTO                 | 155                   | 7   | (4.5%)  | 1.98 | 0.91-4.30  | 1.98 | 0.88-4.46             | <5 |         | NC          |                   | NC          |                       |  |
| HLHS                  | 45                    | <5  |         | NC   |            | NC   |                       | <5 |         | NC          |                   | NC          |                       |  |
| Aortic stenosis       | 28                    | <5  |         | NC   |            | NC   |                       | <5 |         | NC          |                   | NC          |                       |  |
| Coarctation of aorta  | 39                    | <5  |         | NC   |            | NC   |                       | <5 |         | NC          |                   | NC          |                       |  |
| Bicuspid aortic valve | 37                    | <5  |         | NC   |            | NC   |                       | <5 |         | NC          |                   | NC          |                       |  |
| RVOTO                 | 127                   | <5  |         | NC   |            | NC   |                       | <5 |         | NC          |                   | NC          |                       |  |
| P(v)S                 | 94                    | <5  |         | NC   |            | NC   |                       | <5 |         | NC          |                   | NC          |                       |  |
| Pulmonary atresia     | 13                    | <5  |         | NC   |            | NC   |                       | <5 |         | NC          |                   | NC          |                       |  |
| Septal                | 459                   | 14  | (3.1%)  | 1.31 | 0.75-2.30  | 1.27 | 0.70-2.28             | 6  | (1.3%)  | <b>3.70</b> | <b>1.48-9.25*</b> | <b>3.06</b> | <b>1.14-8.23</b>      |  |
| Perimembranous VSD    | 91                    | 5   | (5.5%)  | 2.3  | 0.97-6.08  | 2.33 | 0.91-6.00             | <5 |         | NC          |                   | NC          |                       |  |
| Muscular VSD          | 218                   | <5  |         | NC   |            | NC   |                       | <5 |         | NC          |                   | NC          |                       |  |
| Other VSD             | 67                    | <5  |         | NC   |            | NC   |                       | <5 |         | NC          |                   | NC          |                       |  |
| ASD                   | 82                    | <5  |         | NC   |            | NC   |                       | <5 |         | NC          |                   | NC          |                       |  |
| AVSD                  | 24                    | <5  |         | NC   |            | NC   |                       | <5 |         | NC          |                   | NC          |                       |  |
| APVR                  | 17                    | <5  |         | NC   |            | NC   |                       | <5 |         | NC          |                   | NC          |                       |  |
| Total APVR            | 11                    | <5  |         | NC   |            | NC   |                       | <5 |         | NC          |                   | NC          |                       |  |
| Complex               | 38                    | <5  |         | NC   |            | NC   |                       | <5 |         | NC          |                   | NC          |                       |  |
| Single ventricle      | 11                    | <5  |         | NC   |            | NC   |                       | <5 |         | NC          |                   | NC          |                       |  |
| Associations          |                       |     |         |      |            |      |                       |    |         |             |                   |             |                       |  |
| CoA + VSD             | 14                    | <5  |         | NC   |            | NC   |                       | <5 |         | NC          |                   | NC          |                       |  |
| P(v)S + VSD           | 17                    | <5  |         | NC   |            | NC   |                       | <5 |         | NC          |                   | NC          |                       |  |

CHD, congenital heart defects; d-TGA, dextro-transposition of the great arteries; LVOTO, left ventricular outflow tract obstruction; HLHS, hypoplastic left heart syndrome; RVOTO, right ventricular outflow tract obstruction; P(v)S, pulmonary (valve) stenosis; CoA, coarctation of aorta; VSD, ventricular septal defect; ASD, atrial septal defect; AVSD, atrioventricular septal defect; APVR, anomalous pulmonary venous return; NC, not calculated due to sparse data. <sup>a</sup> Adjusted for child sex, maternal age at delivery (as continuous variable), education level, maternal BMI (as

continuous variable), smoking and alcohol use during pregnancy, folic acid supplementation, and fertility problems. \*p-value <0.01. **Bold indicates significant value (P<0.05)**

**Table S3** Prevalence, crude OR and adjusted OR of maternal periconceptual exposure and multiple CHDs in the offspring.

| CHD classification  | Occupational exposure |         |         |            |           |                       |              |         |         |            |           |                       |           |
|---------------------|-----------------------|---------|---------|------------|-----------|-----------------------|--------------|---------|---------|------------|-----------|-----------------------|-----------|
|                     | Any exposure          |         |         |            |           |                       | Organic dust |         |         |            |           |                       |           |
|                     | Total                 | Exposed |         | Unadjusted |           | Adjusted <sup>a</sup> |              | Exposed |         | Unadjusted |           | Adjusted <sup>a</sup> |           |
|                     | n                     | n       | %       | OR         | 95% CI    | OR                    | 95% CI       | n       | %       | OR         | 95% CI    | OR                    | 95% CI    |
| Controls            | 5602                  | 1992    | (35.6%) | Ref        |           | Ref                   | 1992         | 109     | (66.1%) | Ref        |           | Ref                   |           |
| Total CHD           | 165                   | 68      | (41.1%) | 1.27       | 0.93-1.74 | 1.23                  | 0.88-1.73    | 56      | (33.9%) | 1.27       | 0.91-1.76 | 1.37                  | 0.97-1.94 |
| Conotruncal         | 30                    | 14      | (46.7%) | 1.59       | 0.77-3.26 | 1.42                  | 0.65-3.10    | 12      | (40.0%) | 1.64       | 0.79-3.42 | 1.78                  | 0.81-3.89 |
| d-TGA               | 10                    | 5       | (50.0%) | 1.81       | 0.52-6.27 | 1.43                  | 0.37-5.54    | 5       | (50.0%) | 2.46       | 0.71-8.52 | 2.16                  | 0.57-8.22 |
| Tetralogy of Fallot | 15                    | 7       | (46.7%) | 1.59       | 0.57-4.38 | 1.32                  | 0.45-3.92    | 6       | (40.0%) | 1.64       | 0.58-4.62 | 1.95                  | 0.66-5.72 |
| LVOTO               | 18                    | 7       | (38.9%) | 1.15       | 0.45-2.98 | 1.09                  | 0.41-2.89    | 7       | (38.9%) | 1.57       | 0.61-4.05 | 1.58                  | 0.60-4.14 |
| RVOTO               | 12                    | 6       | (50.0%) | 1.81       | 0.58-5.63 | 2.32                  | 0.73-7.40    | 6       | (50.0%) | 2.46       | 0.79-7.65 | 3.11                  | 0.97-9.99 |
| Septal              | 85                    | 30      | (35.3%) | 0.99       | 0.63-1.55 | 0.88                  | 0.54-1.42    | 21      | (24.7%) | 0.81       | 0.49-1.33 | 0.86                  | 0.52-1.44 |
| Perimembranous VSD  | 26                    | 10      | (38.5%) | 1.13       | 0.51-2.50 | 0.93                  | 0.39-2.18    | 7       | (26.9%) | 0.91       | 0.38-2.16 | 1.04                  | 0.43-2.56 |
| Muscular VSD        | 30                    | 9       | (30.0%) | 0.78       | 0.36-1.70 | 0.79                  | 0.35-1.78    | 6       | (20.0%) | 0.62       | 0.25-1.51 | 0.70                  | 0.28-1.76 |
| Other VSD           | 11                    | 5       | (45.5%) | 1.51       | 0.46-4.96 | 1.45                  | 0.40-5.24    | <5      |         | NC         |           | NC                    |           |
| ASD                 | 16                    | 5       | (31.3%) | 0.82       | 0.29-2.37 | 0.78                  | 0.26-2.33    | <5      |         | NC         |           | NC                    |           |
| AVSD                | 4                     | <5      |         | NC         |           | NC                    |              | <5      |         | NC         |           | NC                    |           |
| APVR                | 2                     | <5      |         | NC         |           | NC                    |              | <5      |         | NC         |           | NC                    |           |
| Complex             | 7                     | <5      |         | NC         |           | NC                    |              | <5      |         | NC         |           | NC                    |           |

CHD, congenital heart defects; d-TGA, dextro-transposition of the great arteries; LVOTO, left ventricular outflow tract obstruction; HLHS, hypoplastic left heart syndrome; RVOTO, right ventricular outflow tract obstruction; P(v)S, pulmonary (valve) stenosis; CoA, coarctation of aorta; VSD, ventricular septal defect; ASD, atrial septal defect; AVSD, atrioventricular septal defect; APVR, anomalous pulmonary venous return; NC, not calculated due to sparse data. <sup>a</sup> Adjusted for child sex, maternal age at delivery (as continuous variable), education level, maternal BMI (as continuous variable), smoking and alcohol use during pregnancy, folic acid supplementation, and fertility problems. \*p-value <0.01. Exposure to metal dust and fumes was not calculated due to zero exposed cases. **Bold indicates significant value (P<0.05)**

**Table S3** Continued.

| CHD classification  | Occupational exposure |         |         |            |           |                       |           |         |         |            |           |                       |           |
|---------------------|-----------------------|---------|---------|------------|-----------|-----------------------|-----------|---------|---------|------------|-----------|-----------------------|-----------|
|                     | Mineral dust          |         |         |            |           |                       | Solvents  |         |         |            |           |                       |           |
|                     | Total                 | Exposed |         | Unadjusted |           | Adjusted <sup>a</sup> |           | Exposed |         | Unadjusted |           | Adjusted <sup>a</sup> |           |
| n                   | n                     | %       | OR      | 95% CI     | OR        | 95% CI                | n         | %       | OR      | 95% CI     | OR        | 95% CI                |           |
| Controls            | 5602                  | 418     | (7.5%)  | Ref        |           | Ref                   |           | 1370    | (24.5%) | Ref        |           | Ref                   |           |
| Total CHD           | 165                   | 16      | (9.7%)  | 1.33       | 0.79-2.25 | 1.13                  | 0.64-2.01 | 37      | (22.4%) | 0.89       | 0.62-1.29 | 0.96                  | 0.66-1.41 |
| Conotruncal         | 30                    | 5       | (16.7%) | 2.48       | 0.95-6.51 | 2.01                  | 0.66-6.16 | 5       | (16.7%) | 0.62       | 0.24-1.62 | 0.70                  | 0.26-1.86 |
| d-TGA               | 10                    | <5      |         | NC         |           | NC                    |           | <5      |         | NC         |           | NC                    |           |
| Tetralogy of Fallot | 15                    | <5      |         | NC         |           | NC                    |           | <5      |         | NC         |           | NC                    |           |
| LVOTO               | 18                    | <5      |         | NC         |           | NC                    |           | 5       | (27.8%) | 1.19       | 0.42-3.34 | 1.19                  | 0.42-3.37 |
| RVOTO               | 12                    | <5      |         | NC         |           | NC                    |           | <5      |         | NC         |           | NC                    |           |
| Septal              | 85                    | 7       | (8.2%)  | 1.11       | 0.51-2.43 | 0.85                  | 0.37-1.94 | 14      | (16.5%) | 0.61       | 0.34-1.08 | 0.65                  | 0.36-1.18 |
| Perimembranous VSD  | 26                    | <5      |         | NC         |           | NC                    |           | 5       | (19.2%) | 0.74       | 0.28-1.95 | 0.79                  | 0.29-2.16 |
| Muscular VSD        | 30                    | <5      |         | NC         |           | NC                    |           | <5      |         | NC         |           | NC                    |           |
| Other VSD           | 11                    | <5      |         | NC         |           | NC                    |           | <5      |         | NC         |           | NC                    |           |
| ASD                 | 16                    | <5      |         | NC         |           | NC                    |           | <5      |         | NC         |           | NC                    |           |
| AVSD                | 4                     | <5      |         | NC         |           | NC                    |           | <5      |         | NC         |           | NC                    |           |
| APVR                | 2                     | <5      |         | NC         |           | NC                    |           | <5      |         | NC         |           | NC                    |           |
| Complex             | 7                     | <5      |         | NC         |           | NC                    |           | <5      |         | NC         |           | NC                    |           |

CHD, congenital heart defects; d-TGA, dextro-transposition of the great arteries; LVOTO, left ventricular outflow tract obstruction; HLHS, hypoplastic left heart syndrome; RVOTO, right ventricular outflow tract obstruction; P(v)S, pulmonary (valve) stenosis; CoA, coarctation of aorta; VSD, ventricular septal defect; ASD, atrial septal defect; AVSD, atrioventricular septal defect; APVR, anomalous pulmonary venous return; NC, not calculated due to sparse data. <sup>a</sup> Adjusted for child sex, maternal age at delivery (as continuous variable), education level, maternal BMI (as continuous variable), smoking and alcohol use during pregnancy, folic acid supplementation, and fertility problems. \*p-value <0.01. Exposure to metal dust and fumes was not calculated due to zero exposed cases. **Bold indicates significant value (P<0.05)**

**Table S3** Continued.

| CHD classification  | Occupational exposure |            |    |            |           |                       |           |
|---------------------|-----------------------|------------|----|------------|-----------|-----------------------|-----------|
|                     | Pesticides            |            |    |            |           |                       |           |
|                     | Total                 | Exposed    |    | Unadjusted |           | Adjusted <sup>a</sup> |           |
| n                   | n                     | %          | OR | 95% CI     | OR        | 95% CI                |           |
| Controls            | 5602                  | 131 (2.3%) |    | Ref        |           | Ref                   |           |
| Total CHD           | 165                   | 5 (3.0%)   |    | 1.31       | 0.53-3.23 | 1.27                  | 0.50-3.24 |
| Conotruncal         | 30                    | <5         |    | NC         |           | NC                    |           |
| d-TGA               | 10                    | <5         |    | NC         |           | NC                    |           |
| Tetralogy of Fallot | 15                    | <5         |    | NC         |           | NC                    |           |
| LVOTO               | 18                    | <5         |    | NC         |           | NC                    |           |
| RVOTO               | 12                    | <5         |    | NC         |           | NC                    |           |
| Septal              | 85                    | <5         |    | NC         |           | NC                    |           |
| Perimembranous VSD  | 26                    | <5         |    | NC         |           | NC                    |           |
| Muscular VSD        | 30                    | <5         |    | NC         |           | NC                    |           |
| Other VSD           | 11                    | <5         |    | NC         |           | NC                    |           |
| ASD                 | 16                    | <5         |    | NC         |           | NC                    |           |
| AVSD                | 4                     | <5         |    | NC         |           | NC                    |           |
| APVR                | 2                     | <5         |    | NC         |           | NC                    |           |
| Complex             | 7                     | <5         |    | NC         |           | NC                    |           |

CHD, congenital heart defects; d-TGA, dextro-transposition of the great arteries; LVOTO, left ventricular outflow tract obstruction; HLHS, hypoplastic left heart syndrome; RVOTO, right ventricular outflow tract obstruction; P(v)S, pulmonary (valve) stenosis; CoA, coarctation of aorta; VSD, ventricular septal defect; ASD, atrial septal defect; AVSD, atrioventricular septal defect; APVR, anomalous pulmonary venous return; NC, not calculated due to sparse data. <sup>a</sup> Adjusted for child sex, maternal age at delivery (as continuous variable), education level, maternal BMI (as continuous variable), smoking and alcohol use during pregnancy, folic acid supplementation, and fertility problems. \*p-value <0.01. Exposure to metal dust and fumes was not calculated due to zero exposed cases.

**Bold indicates significant value (P<0.05)**

**Table S4** Prevalence, crude OR and adjusted OR of maternal occupational exposure and CHDs in the offspring restricted to non-drinking and non-smoking women.

| CHD classification    | Occupational exposure |         |         |             |                  |                       |              |         |         |             |                  |                       |                  |
|-----------------------|-----------------------|---------|---------|-------------|------------------|-----------------------|--------------|---------|---------|-------------|------------------|-----------------------|------------------|
|                       | Any exposure          |         |         |             |                  |                       | Organic dust |         |         |             |                  |                       |                  |
|                       | Total                 | Exposed |         | Unadjusted  |                  | Adjusted <sup>a</sup> |              | Exposed |         | Unadjusted  |                  | Adjusted <sup>a</sup> |                  |
|                       | n                     | n       | %       | OR          | 95% CI           | OR                    | 95% CI       | n       | %       | OR          | 95% CI           | OR                    | 95% CI           |
| Controls              | 4622                  | 1625    | (35.2%) | Ref         |                  | Ref                   | 1992         | 1341    | (29.0%) | Ref         |                  | Ref                   |                  |
| Total CHD             | 703                   | 254     | (37.1%) | 1.04        | 0.88-1.23        | 0.99                  | 0.83-1.18    | 204     | (29.0%) | 1.00        | 0.84-1.19        | 1.00                  | 0.83-1.20        |
| Conotruncal           | 92                    | 36      | (39.1%) | 1.19        | 0.78-1.81        | 1.17                  | 0.75-1.82    | 31      | (33.7%) | 1.24        | 0.80-1.93        | 1.24                  | 0.79-1.95        |
| d-TGA                 | 74                    | 16      | (40.0%) | 1.23        | 0.65-2.32        | 1.23                  | 0.63-2.42    | 13      | (32.5%) | 1.18        | 0.61-2.29        | 1.18                  | 0.59-2.36        |
| Tetralogy of Fallot   | 32                    | 13      | (40.6%) | 1.26        | 0.62-2.56        | 1.34                  | 0.64-2.80    | 12      | (37.5%) | 1.47        | 0.72-3.01        | 1.58                  | 0.76-3.29        |
| LVOTO                 | 105                   | 32      | (30.5%) | 0.81        | 0.53-1.23        | 0.71                  | 0.45-1.10    | 27      | (25.7%) | 0.85        | 0.54-1.32        | 0.82                  | 0.52-1.30        |
| HLHS                  | 32                    | 13      | (40.6%) | 1.26        | 0.62-2.56        | 0.99                  | 0.47-2.08    | 11      | (34.4%) | 1.28        | 0.62-2.67        | 1.05                  | 0.49-2.26        |
| Aortic stenosis       | 21                    | <5      |         | NC          |                  | NC                    |              | <5      |         | NC          |                  | NC                    |                  |
| Coarctation of aorta  | 19                    | 6       | (31.6%) | 0.85        | 0.32-2.24        | 0.67                  | 0.23-1.92    | 5       | (26.3%) | 0.87        | 0.31-2.43        | 0.95                  | 0.33-2.71        |
| Bicuspid aortic valve | 26                    | 7       | (26.9%) | 0.68        | 0.29-1.62        | 0.59                  | 0.24-1.45    | 6       | (23.1%) | 0.73        | 0.29-1.83        | 0.71                  | 0.28-1.79        |
| RVOTO                 | 88                    | 40      | (45.5%) | <b>1.54</b> | <b>1.01-2.35</b> | 1.43                  | 0.92-2.21    | 34      | (38.6%) | 1.54        | 0.99-2.38        | 1.48                  | 0.95-2.31        |
| P(v)S                 | 64                    | 32      | (50.0%) | <b>1.84</b> | <b>1.13-3.02</b> | 1.70                  | 1.02-2.83    | 27      | (42.2%) | <b>1.79</b> | <b>1.08-2.94</b> | <b>1.70</b>           | <b>1.02-2.83</b> |
| Pulmonary atresia     | 8                     | <5      |         | NC          |                  | NC                    |              | <5      |         | NC          |                  | NC                    |                  |
| Septal                | 333                   | 114     | (34.2%) | 0.96        | 0.76-1.21        | 0.90                  | 0.70-1.15    | 86      | (25.8%) | 0.85        | 0.66-1.10        | 0.86                  | 0.66-1.12        |
| Perimembranous VSD    | 74                    | 28      | (37.8%) | 1.12        | 0.70-1.80        | 1.05                  | 0.64-1.73    | 21      | (28.4%) | 0.97        | 0.58-1.61        | 1.01                  | 0.60-1.70        |
| Muscular VSD          | 157                   | 50      | (31.8%) | 0.86        | 0.61-1.21        | 0.86                  | 0.61-1.23    | 40      | (25.5%) | 0.84        | 0.58-1.20        | 1.88                  | 0.60-1.28        |
| Other VSD             | 40                    | 13      | (32.5%) | 0.89        | 0.46-1.73        | 0.86                  | 0.43-1.73    | 9       | (22.5%) | 0.71        | 0.34-1.50        | 0.72                  | 0.34-1.55        |
| ASD                   | 60                    | 23      | (38.3%) | 1.15        | 0.70-1.94        | 0.97                  | 0.57-1.66    | 16      | (26.7%) | 0.89        | 0.50-1.58        | 0.82                  | 0.45-1.46        |
| AVSD                  | 28                    | 7       | (25.0%) | 0.60        | 0.26-1.42        | 0.67                  | 0.27-1.63    | 6       | (21.4%) | 0.67        | 0.27-1.66        | 0.81                  | 0.32-2.06        |
| APVR                  | 9                     | <5      |         | NC          |                  | NC                    |              | <5      |         | NC          |                  | NC                    |                  |
| Complex               | 24                    | 9       | (37.5%) | 1.11        | 0.48-2.53        | 1.16                  | 0.48-2.79    | 7       | (29.2%) | 1.01        | 0.42-2.44        | 1.10                  | 0.44-2.75        |
| Single ventricle      | 8                     | <5      |         | NC          |                  | NC                    |              | <5      |         | NC          |                  | NC                    |                  |
| Associations          |                       |         |         |             |                  |                       |              |         |         |             |                  |                       |                  |
| CoA + VSD             | 7                     | <5      |         | NC          |                  | NC                    |              | <5      |         | NC          |                  | NC                    |                  |
| P(v)S + VSD           | 10                    | 6       | (60.0%) | 2.77        | 0.77-9.82        | 3.43                  | 0.95-12.43   | 5       | (50.0%) | 2.45        | <b>0.90-5.47</b> | <b>2.83</b>           | <b>0.81-9.90</b> |

CHD, congenital heart defects; d-TGA, dextro-transposition of the great arteries; LVOTO, left ventricular outflow tract obstruction; HLHS, hypoplastic left heart syndrome; RVOTO, right ventricular outflow tract obstruction; P(v)S, pulmonary (valve) stenosis; CoA, coarctation of aorta; VSD, ventricular septal defect; ASD, atrial septal defect; AVSD, atrioventricular septal defect; APVR, anomalous pulmonary venous return; NC, not calculated due to sparse data.

<sup>a</sup> Adjusted for child sex, maternal age at delivery (as continuous variable), education level, maternal BMI (as continuous variable), folic acid supplementation, and fertility problems. \*p-value <0.01. **Bold indicates significant value (P<0.05)**



Table S4 Continued.

| CHD classification    | Occupational exposure |         |         |             |                   |                       |                  |         |         |            |            |                       |            |
|-----------------------|-----------------------|---------|---------|-------------|-------------------|-----------------------|------------------|---------|---------|------------|------------|-----------------------|------------|
|                       | Mineral dust          |         |         |             |                   |                       | Solvents         |         |         |            |            |                       |            |
|                       | Total                 | Exposed |         | Unadjusted  |                   | Adjusted <sup>a</sup> |                  | Exposed |         | Unadjusted |            | Adjusted <sup>a</sup> |            |
|                       | n                     | n       | %       | OR          | 95% CI            | OR                    | 95% CI           | n       | %       | OR         | 95% CI     | OR                    | 95% CI     |
| Controls              | 4622                  | 312     | (6.8%)  | Ref         |                   | Ref                   |                  | 1151    | (24.0%) | Ref        |            | Ref                   |            |
| Total CHD             | 703                   | 63      | (9.0%)  | <b>1.36</b> | <b>1.02-1.81</b>  | 1.87                  | 0.94-1.73        | 169     | (24.9%) | 0.95       | 0.79-1.15  | 0.93                  | 0.77-1.13  |
| Conotruncal           | 92                    | 10      | (10.9%) | 1.69        | 0.87-3.28         | 1.67                  | 0.83-3.36        | 23      | (25.0%) | 1.01       | 0.62-1.62  | 1.04                  | 0.64-1.69  |
| d-TGA                 | 74                    | 5       | (12.5%) | 1.97        | 0.77-5.07         | 2.03                  | 0.75-5.47        | 9       | (22.5%) | 0.88       | 0.42-1.84  | 0.99                  | 0.46-2.12  |
| Tetralogy of Fallot   | 32                    | <5      |         | NC          |                   | NC                    |                  | 9       | (28.1%) | 1.18       | 0.54-2.56  | 1.19                  | 0.54-2.63  |
| LVOTO                 | 105                   | 8       | (7.6%)  | 1.14        | 0.55-2.36         | 1.08                  | 0.51-2.32        | 21      | (20.0%) | 0.75       | 0.47-1.22  | 0.70                  | 0.42-1.16  |
| HLHS                  | 32                    | <5      |         | NC          |                   | NC                    |                  | 9       | (28.1%) | 1.18       | 0.54-2.56  | 0.90                  | 0.40-2.05  |
| Aortic stenosis       | 21                    | <5      |         | NC          |                   | NC                    |                  | <5      |         | NC         |            | NC                    |            |
| Coarctation of aorta  | 19                    | <5      |         | NC          |                   | NC                    |                  | <5      |         | NC         |            | NC                    |            |
| Bicuspid aortic valve | 26                    | <5      |         | NC          |                   | NC                    |                  | 6       | (23.1%) | 0.91       | 0.36-2.26  | 0.88                  | 0.35-2.25  |
| RVOTO                 | 88                    | 14      | (15.9%) | <b>1.61</b> | <b>1.46-4.68*</b> | <b>2.36</b>           | <b>1.26-4.40</b> | 26      | (29.5%) | 1.27       | 0.80-2.01  | 1.19                  | 0.74-1.91  |
| P(v)S                 | 64                    | 11      | (17.2%) | <b>2.87</b> | <b>1.48-5.54*</b> | <b>2.46</b>           | <b>1.21-4.97</b> | 20      | (31.3%) | 1.37       | 0.81-2.34  | 1.32                  | 0.77-2.27  |
| Pulmonary atresia     | 8                     | <5      |         | NC          |                   | NC                    |                  | <5      |         | NC         |            | NC                    |            |
| Septal                | 333                   | 27      | (8.1%)  | 1.22        | 0.81-1.84         | 1.10                  | 0.71-1.70        | 74      | (22.2%) | 0.86       | 0.66-1.13  | 0.85                  | 0.64-1.12  |
| Perimembranous VSD    | 74                    | 5       | (6.8%)  | 1.00        | 0.40-2.50         | 0.90                  | 0.35-2.33        | 20      | (27.0%) | 1.12       | 0.67-1.87  | 1.14                  | 0.67-1.94  |
| Muscular VSD          | 157                   | 16      | (10.2%) | 1.57        | 0.92-2.66         | 1.55                  | 0.88-2.74        | 30      | (19.1%) | 0.71       | 0.48-1.07  | 0.73                  | 0.48-1.09  |
| Other VSD             | 40                    | <5      |         | NC          |                   | NC                    |                  | 8       | (20.0%) | 0.75       | 0.35-1.64  | 0.75                  | 0.34-1.65  |
| ASD                   | 60                    | <5      |         | NC          |                   | NC                    |                  | 16      | (26.7%) | 1.10       | 0.62-1.95  | 0.98                  | 0.54-1.75  |
| AVSD                  | 28                    | <5      |         | NC          |                   | NC                    |                  | <5      |         | NC         |            | NC                    |            |
| APVR                  | 9                     | <5      |         | NC          |                   | NC                    |                  | <5      |         | NC         |            | NC                    |            |
| Complex               | 24                    | <5      |         | NC          |                   | NC                    |                  | 7       | (29.2%) | 1.24       | 0.51-3.00  | 1.27                  | 0.51-3.17  |
| Single ventricle      | 8                     | <5      |         | NC          |                   | NC                    |                  | <5      |         | NC         |            | NC                    |            |
| Associations          |                       |         |         |             |                   |                       |                  |         |         |            |            |                       |            |
| CoA + VSD             | 7                     | <5      |         | NC          |                   | NC                    |                  | <5      |         | NC         |            | NC                    |            |
| P(v)S + VSD           | 10                    | <5      |         | NC          |                   | NC                    |                  | 5       | (50.0%) | 3.02       | 0.87-10.44 | 3.30                  | 0.94-11.58 |

CHD, congenital heart defects; d-TGA, dextro-transposition of the great arteries; LVOTO, left ventricular outflow tract obstruction; HLHS, hypoplastic left heart syndrome; RVOTO, right ventricular outflow tract obstruction; P(v)S, pulmonary (valve) stenosis; CoA, coarctation of aorta; VSD, ventricular septal defect; ASD, atrial septal defect; AVSD, atrioventricular septal defect; APVR, anomalous pulmonary venous return; NC, not calculated due to sparse data. <sup>a</sup> Adjusted for child sex, maternal age at delivery (as continuous variable), education level, maternal BMI (as continuous variable), folic acid supplementation, and fertility problems. \*p-value <0.01. **Bold indicates significant value (P<0.05)**

Table S4 Continued.

| CHD classification    | Occupational exposure |         |        |             |                  |                       |                      |         |        |             |                   |                       |                   |
|-----------------------|-----------------------|---------|--------|-------------|------------------|-----------------------|----------------------|---------|--------|-------------|-------------------|-----------------------|-------------------|
|                       | Pesticides            |         |        |             |                  |                       | Metal dust and fumes |         |        |             |                   |                       |                   |
|                       | Total                 | Exposed |        | Unadjusted  |                  | Adjusted <sup>a</sup> |                      | Exposed |        | Unadjusted  |                   | Adjusted <sup>a</sup> |                   |
|                       | n                     | n       | %      | OR          | 95% CI           | OR                    | 95% CI               | n       | %      | OR          | 95% CI            | OR                    | 95% CI            |
| Controls              | 4622                  | 104     | (2.3%) | Ref         |                  | Ref                   |                      | 11      | (0.2%) | Ref         |                   | Ref                   |                   |
| Total CHD             | 703                   | 23      | (3.3%) | 1.47        | 0.93-2.33        | 1.35                  | 0.83-2.18            | 8       | (1.1%) | <b>4.83</b> | <b>1.93-12.04</b> | <b>3.84</b>           | <b>1.38-10.65</b> |
| Conotruncal           | 92                    | <5      |        | NC          |                  | NC                    |                      | <5      |        | NC          |                   | NC                    |                   |
| d-TGA                 | 74                    | <5      |        | NC          |                  | NC                    |                      | <5      |        | NC          |                   | NC                    |                   |
| Tetralogy of Fallot   | 32                    | <5      |        | NC          |                  | NC                    |                      | <5      |        | NC          |                   | NC                    |                   |
| LVOTO                 | 105                   | <5      |        | NC          |                  | NC                    |                      | <5      |        | NC          |                   | NC                    |                   |
| HLHS                  | 32                    | <5      |        | NC          |                  | NC                    |                      | <5      |        | NC          |                   | NC                    |                   |
| Aortic stenosis       | 21                    | <5      |        | NC          |                  | NC                    |                      | <5      |        | NC          |                   | NC                    |                   |
| Coarctation of aorta  | 19                    | <5      |        | NC          |                  | NC                    |                      | <5      |        | NC          |                   | NC                    |                   |
| Bicuspid aortic valve | 26                    | <5      |        | NC          |                  | NC                    |                      | <5      |        | NC          |                   | NC                    |                   |
| RVOTO                 | 88                    | <5      |        | NC          |                  | NC                    |                      | <5      |        | NC          |                   | NC                    |                   |
| P(v)S                 | 64                    | <5      |        | NC          |                  | NC                    |                      | <5      |        | NC          |                   | NC                    |                   |
| Pulmonary atresia     | 8                     | <5      |        | NC          |                  | NC                    |                      | <5      |        | NC          |                   | NC                    |                   |
| Septal                | 333                   | 14      | (4.2%) | <b>1.91</b> | <b>1.08-3.37</b> | <b>1.71</b>           | <b>0.94-3.11</b>     | <5      |        | NC          |                   | NC                    |                   |
| Perimembranous VSD    | 74                    | 5       | (6.8%) | <b>3.15</b> | <b>1.24-7.97</b> | <b>2.92</b>           | <b>1.11-7.67</b>     | <5      |        | NC          |                   | NC                    |                   |
| Muscular VSD          | 157                   | 5       | (3.2%) | 1.43        | 0.57-3.56        | 1.37                  | 0.53-3.51            | <5      |        | NC          |                   | NC                    |                   |
| Other VSD             | 40                    | <5      |        | NC          |                  | NC                    |                      | <5      |        | NC          |                   | NC                    |                   |
| ASD                   | 60                    | <5      |        | NC          |                  | NC                    |                      | <5      |        | NC          |                   | NC                    |                   |
| AVSD                  | 28                    | <5      |        | NC          |                  | NC                    |                      | <5      |        | NC          |                   | NC                    |                   |
| APVR                  | 9                     | <5      |        | NC          |                  | NC                    |                      | <5      |        | NC          |                   | NC                    |                   |
| Complex               | 24                    | <5      |        | NC          |                  | NC                    |                      | <5      |        | NC          |                   | NC                    |                   |
| Single ventricle      | 8                     | <5      |        | NC          |                  | NC                    |                      | <5      |        | NC          |                   | NC                    |                   |
| Associations          |                       |         |        |             |                  |                       |                      |         |        |             |                   |                       |                   |
| CoA + VSD             | 7                     | <5      |        | NC          |                  | NC                    |                      | <5      |        | NC          |                   | NC                    |                   |
| P(v)S + VSD           | 10                    | <5      |        | NC          |                  | NC                    |                      | <5      |        | NC          |                   | NC                    |                   |

CHD, congenital heart defects; d-TGA, dextro-transposition of the great arteries; LVOTO, left ventricular outflow tract obstruction; HLHS, hypoplastic left heart syndrome; RVOTO, right ventricular outflow tract obstruction; P(v)S, pulmonary (valve) stenosis; CoA, coarctation of aorta; VSD, ventricular septal defect; ASD, atrial septal defect; AVSD, atrioventricular septal defect; APVR, anomalous pulmonary venous return; NC, not calculated due to sparse data. <sup>a</sup> Adjusted for child sex, maternal age at delivery (as continuous variable), education level, maternal BMI (as continuous variable), folic acid supplementation, and fertility problems. \*p-value <0.01. **Bold indicates significant value (P<0.05)**

**Table S5** Prevalence, crude OR and adjusted OR of maternal occupational exposure and CHDs in the offspring.

|                     | Controls<br>(n=5602) |         | CHDs<br>(n=1174) |         | Unadjusted  |                  | Adjusted <sup>a</sup> |           |
|---------------------|----------------------|---------|------------------|---------|-------------|------------------|-----------------------|-----------|
|                     | n                    | (%)     | n                | (%)     | OR          | 95% CI           | OR                    | 95% CI    |
| <b>Any exposure</b> |                      |         |                  |         |             |                  |                       |           |
| No exposure         | 3611                 | (64.5%) | 733              | (62.4%) | Ref         |                  | Ref                   |           |
| Low exposure        | 1802                 | (32.2%) | 386              | (32.9%) | 1.06        | 0.92-1.21        | 1.00                  | 0.86-1.16 |
| High exposure       | 189                  | (3.4%)  | 55               | (4.7%)  | <b>1.43</b> | <b>1.05-1.96</b> | 1.37                  | 0.97-1.94 |

CHD, congenital heart defects. <sup>a</sup> Adjusted for child sex, maternal age at delivery (as continuous variable), educational level, maternal BMI (as continuous variable), smoking and alcohol use during pregnancy, folic acid supplementation, and fertility problems. **Bold indicates significant value (P<0.05)**
